# Supplementary material for: Microbial Communities and Organic Matter Composition in Surface and Subsurface Sediments of the Helgoland Mud Area, North Sea
Source: Front Microbiol. 2015 Nov 25;6:1290. doi: 10.3389/fmicb.2015.01290 (PMC4658423; doi:10.3389/fmicb.2015.01290)
Supplement: Supplementary file 3 [file DataSheet3.XLSX]

## Sheet: Sheet1
	TOC	TN	OP9_JS1_SB45	Deltaproteobacteria	Gammaproteobacteria	Betaproteobacteria	Alphaproetobacteria	Firmicutes	OP1	OP8	Elusimicrobia	Planctomycetes	LCP89	WS3	Actinobacteria	Spirochaetes	Chloroflexi	Dehalococcoidaceae	GIF9	OPB11	Thermoplasmata	ANME-2c	Methanomicrobiales	Methanosarcinaceae	Methanosaetaceae	ANME 1	MBGB	MCG	Parvarchaea	MHVG	Unclassified MCG	MCG_B10	MCG_pGrfC26
TOC	0	0.0055556	0.37222	0.75	0.072222	0.0055556	0.51111	0.11111	0.51111	0.3	0.11111	0.75	0.37222	0.47222	0.33333	0.71111	0.016667	0.072222	0.11111	0.81111	0.072222	0.5	0.044444	0.044444	0.37222	1	0.12222	0.37222	0.51111	0.43333	0.27222	0.55556	0.027778
TN	0.98518	0	0.52222	0.66667	0.1	0.011111	0.43333	0.1	0.43333	0.43333	0.14444	0.66667	0.52222	0.43333	0.31111	0.93333	0.011111	0.044444	0.1	0.75556	0.1	0.43333	0.1	0.1	0.52222	0.93333	0.1	0.43333	0.66667	0.52222	0.24444	0.66667	0.044444
OP9_JS1_SB45	-0.46382	-0.35309	0	0.175	0.175	0.24167	0.24167	0.71389	0.24167	0.56389	0.27222	1	0.0027778	0.24167	0.56389	0.033333	0.71389	0.80278	0.71389	0.16111	0.175	0.33333	0.29722	0.29722	0.0027778	0.13611	0.41944	0.56389	0.13611	0.41944	0.80278	0.71389	0.71389
Deltaproteobacteria	-0.17393	-0.26482	-0.6	0	0.56389	0.80278	0.10278	0.29722	0.10278	0.80278	0.44444	0.56389	0.175	0.24167	0.65833	0.016667	0.35556	0.24167	0.29722	0.2	0.56389	0.33333	0.80278	0.80278	0.175	0.10278	0.80278	0.175	0.10278	0.24167	0.41944	0.29722	0.41944
Gammaproteobacteria	-0.81168	-0.79446	0.6	-0.25714	0	0.016667	0.65833	0.175	0.65833	0.24167	0.061111	0.56389	0.175	0.56389	0.35556	0.35556	0.13611	0.29722	0.175	0.99444	0.0027778	0.33333	0.29722	0.29722	0.175	0.29722	0.13611	0.71389	0.29722	0.35556	0.13611	0.80278	0.175
Betaproteobacteria	-0.98561	-0.97101	0.54286	0.085714	0.88571	0	0.56389	0.13611	0.56389	0.24167	0.094444	0.65833	0.24167	0.56389	0.35556	0.56389	0.016667	0.10278	0.13611	0.93889	0.016667	0.4	0.10278	0.10278	0.24167	0.71389	0.10278	0.41944	0.41944	0.41944	0.175	0.56389	0.033333
Alphaproetobacteria	-0.34786	-0.44137	-0.54286	0.77143	0.2	0.31429	0	0.033333	0.0027778	0.35556	0.83889	0.71389	0.24167	0.016667	0.175	0.10278	0.24167	0.29722	0.033333	0.033333	0.65833	0.4	1	1	0.24167	0.35556	0.65833	0.13611	0.13611	0.41944	0.033333	0.175	0.24167
Firmicutes	-0.7537	-0.79446	-0.14286	0.48571	0.6	0.71429	0.82857	0	0.033333	0.175	0.44444	1	0.71389	0.016667	0.033333	0.56389	0.033333	0.13611	0.0027778	0.10556	0.175	1	0.35556	0.35556	0.71389	0.56389	0.35556	0.10278	0.71389	0.71389	0.033333	0.175	0.016667
OP1	0.34786	0.44137	0.54286	-0.77143	-0.2	-0.31429	-1	-0.82857	0	0.35556	0.83889	0.71389	0.24167	0.016667	0.175	0.10278	0.24167	0.29722	0.033333	0.033333	0.65833	0.4	1	1	0.24167	0.35556	0.65833	0.13611	0.13611	0.41944	0.033333	0.175	0.24167
OP8	0.52179	0.44137	-0.31429	-0.085714	-0.54286	-0.54286	-0.42857	-0.6	0.42857	0	0.83889	0.175	0.56389	0.35556	0.56389	1	0.56389	0.80278	0.175	0.39444	0.24167	0.46667	0.65833	0.65833	0.56389	0.41944	1	0.13611	0.80278	0.80278	0.175	0.033333	0.175
Elusimicrobia	-0.73529	-0.7165	0.55078	-0.40584	0.81168	0.7537	-0.11595	0.40584	0.11595	-0.11595	0	0.2	0.27222	0.83889	0.34444	0.2	0.2	0.34444	0.44444	0.67222	0.061111	0.13333	0.13889	0.13889	0.27222	0.66667	0.13889	0.93889	0.061111	0.044444	0.66667	0.66667	0.27222
Planctomycetes	-0.17393	-0.26482	0.028571	-0.25714	0.31429	0.2	-0.14286	0.028571	0.14286	0.6	0.63775	0	1	1	0.56389	0.56389	0.56389	0.41944	1	0.50556	0.56389	0.13333	0.65833	0.65833	1	0.80278	0.13611	0.24167	0.29722	0.24167	1	0.10278	1
LCP89	0.46382	0.35309	-1	0.6	-0.6	-0.54286	0.54286	0.14286	-0.54286	0.31429	-0.55078	-0.028571	0	0.24167	0.56389	0.033333	0.71389	0.80278	0.71389	0.16111	0.175	0.33333	0.29722	0.29722	0.0027778	0.13611	0.41944	0.56389	0.13611	0.41944	0.80278	0.71389	0.71389
WS3	0.37685	0.44137	0.54286	-0.54286	-0.25714	-0.31429	-0.88571	-0.88571	0.88571	0.42857	-0.11595	0.028571	-0.54286	0	0.016667	0.24167	0.24167	0.41944	0.016667	0.016667	0.56389	0.66667	0.80278	0.80278	0.24167	0.35556	0.80278	0.10278	0.41944	1	0.13611	0.175	0.13611
Actinobacteria	-0.49281	-0.52964	-0.31429	0.2	0.42857	0.42857	0.6	0.82857	-0.6	-0.31429	0.49281	0.25714	0.31429	-0.88571	0	0.71389	0.175	0.41944	0.033333	0.13889	0.35556	0.8	0.56389	0.56389	0.56389	0.56389	0.65833	0.175	0.80278	0.29722	0.24167	0.41944	0.13611
Spirochaetes	0.20292	0.088273	-0.82857	0.88571	-0.42857	-0.25714	0.77143	0.31429	-0.77143	0.028571	-0.63775	-0.25714	0.82857	-0.54286	0.14286	0	0.80278	0.65833	0.56389	0.13889	0.35556	0.2	0.41944	0.41944	0.033333	0.13611	0.71389	0.35556	0.0027778	0.13611	0.41944	0.41944	1
Chloroflexi	0.92763	0.97101	-0.14286	-0.42857	-0.65714	-0.88571	-0.54286	-0.82857	0.54286	0.31429	-0.63775	-0.31429	0.14286	0.54286	-0.6	-0.085714	0	0.0027778	0.033333	0.56667	0.13611	0.46667	0.10278	0.10278	0.71389	0.56389	0.10278	0.29722	0.71389	0.56389	0.175	0.56389	0.016667
Dehalococcoidaceae	0.81168	0.88273	-0.085714	-0.54286	-0.48571	-0.77143	-0.48571	-0.65714	0.48571	0.085714	-0.49281	-0.37143	0.085714	0.37143	-0.37143	-0.2	0.94286	0	0.13611	0.76667	0.29722	0.46667	0.13611	0.13611	0.80278	0.35556	0.033333	0.56389	1	0.71389	0.29722	0.80278	0.13611
GIF9	0.7537	0.79446	0.14286	-0.48571	-0.6	-0.71429	-0.82857	-1	0.82857	0.6	-0.40584	-0.028571	-0.14286	0.88571	-0.82857	-0.31429	0.82857	0.65714	0	0.10556	0.175	1	0.35556	0.35556	0.71389	0.56389	0.35556	0.10278	0.71389	0.71389	0.033333	0.175	0.016667
OPB11	0.13235	0.17912	0.66674	-0.63775	0.028989	-0.057977	-0.86966	-0.72471	0.86966	0.46382	0.23529	0.34786	-0.66674	0.92763	-0.69573	-0.69573	0.28989	0.14494	0.72471	0	0.99444	0.26667	0.83889	0.83889	0.16111	0.39444	0.66667	0.044444	0.22222	0.66667	0.23889	0.094444	0.34444
Thermoplasmata	0.81168	0.79446	-0.6	0.25714	-1	-0.88571	-0.2	-0.6	0.2	0.54286	-0.81168	-0.31429	0.6	0.25714	-0.42857	0.42857	0.65714	0.48571	0.6	-0.028989	0	0.33333	0.29722	0.29722	0.175	0.29722	0.13611	0.71389	0.29722	0.35556	0.13611	0.80278	0.175
ANME-2c	0.4116	0.41779	-0.50709	0.50709	-0.50709	-0.43948	0.43948	0.033806	-0.43948	-0.37187	-0.85749	-0.84515	0.50709	-0.27045	-0.13522	0.67612	0.37187	0.37187	-0.033806	-0.60025	0.50709	0	0.33333	0.33333	0.33333	0.73333	0.2	0.33333	0.13333	0.13333	0.8	0.2	0.8
Methanomicrobiales	-0.84067	-0.79446	0.48571	0.085714	0.48571	0.77143	-0.028571	0.42857	0.028571	-0.2	0.69573	0.2	-0.48571	-0.085714	0.31429	-0.37143	-0.77143	-0.71429	-0.42857	0.11595	-0.48571	-0.5409	0	0.0027778	0.29722	0.65833	0.24167	0.56389	0.24167	0.175	1	0.71389	0.10278
Methanosarcinaceae	-0.84067	-0.79446	0.48571	0.085714	0.48571	0.77143	-0.028571	0.42857	0.028571	-0.2	0.69573	0.2	-0.48571	-0.085714	0.31429	-0.37143	-0.77143	-0.71429	-0.42857	0.11595	-0.48571	-0.5409	1	0	0.29722	0.65833	0.24167	0.56389	0.24167	0.175	1	0.71389	0.10278
Methanosaetaceae	-0.46382	-0.35309	1	-0.6	0.6	0.54286	-0.54286	-0.14286	0.54286	-0.31429	0.55078	0.028571	-1	0.54286	-0.31429	-0.82857	-0.14286	-0.085714	0.14286	0.66674	-0.6	-0.50709	0.48571	0.48571	0	0.13611	0.41944	0.56389	0.13611	0.41944	0.80278	0.71389	0.71389
ANME 1	0	-0.088273	-0.71429	0.77143	-0.48571	-0.14286	0.42857	0.25714	-0.42857	0.37143	-0.23191	0.085714	0.71429	-0.42857	0.31429	0.65714	-0.31429	-0.42857	-0.25714	-0.46382	0.48571	0.16903	0.2	0.2	-0.71429	0	1	0.41944	0.35556	0.80278	0.80278	0.71389	0.56389
MBGB	-0.72471	-0.79446	0.37143	0.085714	0.71429	0.77143	0.2	0.42857	-0.2	0.028571	0.69573	0.65714	-0.37143	-0.085714	0.2	-0.14286	-0.77143	-0.82857	-0.42857	0.23191	-0.71429	-0.67612	0.54286	0.54286	0.37143	-0.028571	0	0.71389	0.56389	0.56389	0.29722	0.56389	0.35556
MCG	0.46382	0.44137	0.25714	-0.6	-0.14286	-0.37143	-0.71429	-0.77143	0.71429	0.71429	0.057977	0.54286	-0.25714	0.77143	-0.6	-0.42857	0.48571	0.31429	0.77143	0.84067	0.14286	-0.50709	-0.31429	-0.31429	0.25714	-0.37143	0.14286	0	0.41944	0.80278	0.29722	0.0027778	0.10278
Parvarchaea	0.34786	0.26482	-0.71429	0.77143	-0.48571	-0.37143	0.65714	0.14286	-0.65714	-0.085714	-0.81168	-0.48571	0.71429	-0.37143	-0.085714	0.94286	0.14286	0.028571	-0.14286	-0.60876	0.48571	0.84515	-0.54286	-0.54286	-0.71429	0.42857	-0.31429	-0.37143	0	0.016667	0.56389	0.35556	0.71389
MHVG	0.40584	0.35309	-0.37143	0.54286	-0.42857	-0.37143	0.37143	-0.14286	-0.37143	-0.085714	-0.84067	-0.54286	0.37143	0.028571	-0.48571	0.71429	0.31429	0.14286	0.14286	-0.23191	0.42857	0.77754	-0.6	-0.6	-0.37143	0.085714	-0.25714	-0.085714	0.88571	0	0.65833	0.56389	0.41944
Unclassified MCG	0.55078	0.61791	0.085714	-0.37143	-0.65714	-0.6	-0.82857	-0.82857	0.82857	0.6	-0.23191	-0.028571	-0.085714	0.71429	-0.54286	-0.37143	0.6	0.48571	0.82857	0.57977	0.65714	-0.13522	-0.028571	-0.028571	0.085714	0.085714	-0.48571	0.48571	-0.31429	-0.2	0	0.35556	0.24167
MCG_B10	0.31887	0.26482	0.14286	-0.48571	-0.085714	-0.25714	-0.6	-0.6	0.6	0.82857	0.23191	0.77143	-0.14286	0.6	-0.37143	-0.37143	0.25714	0.085714	0.6	0.7537	0.085714	-0.67612	-0.14286	-0.14286	0.14286	-0.14286	0.31429	0.94286	-0.42857	-0.25714	0.42857	0	0.175
MCG_pGrfC26	0.89865	0.88273	-0.14286	-0.37143	-0.6	-0.82857	-0.54286	-0.88571	0.54286	0.6	-0.55078	0.028571	0.14286	0.65714	-0.71429	-0.028571	0.88571	0.71429	0.88571	0.49281	0.6	0.13522	-0.77143	-0.77143	-0.14286	-0.25714	-0.42857	0.77143	0.14286	0.37143	0.54286	0.6	0
		strong spearman correlations
		P-values
